# Supplementary material
Source: Springer Nature journal article supplement (https://www.springermedizin.de/resource/supplementary/12889_2007_1170_MOESM2_ESM.pdf/9502608)

B

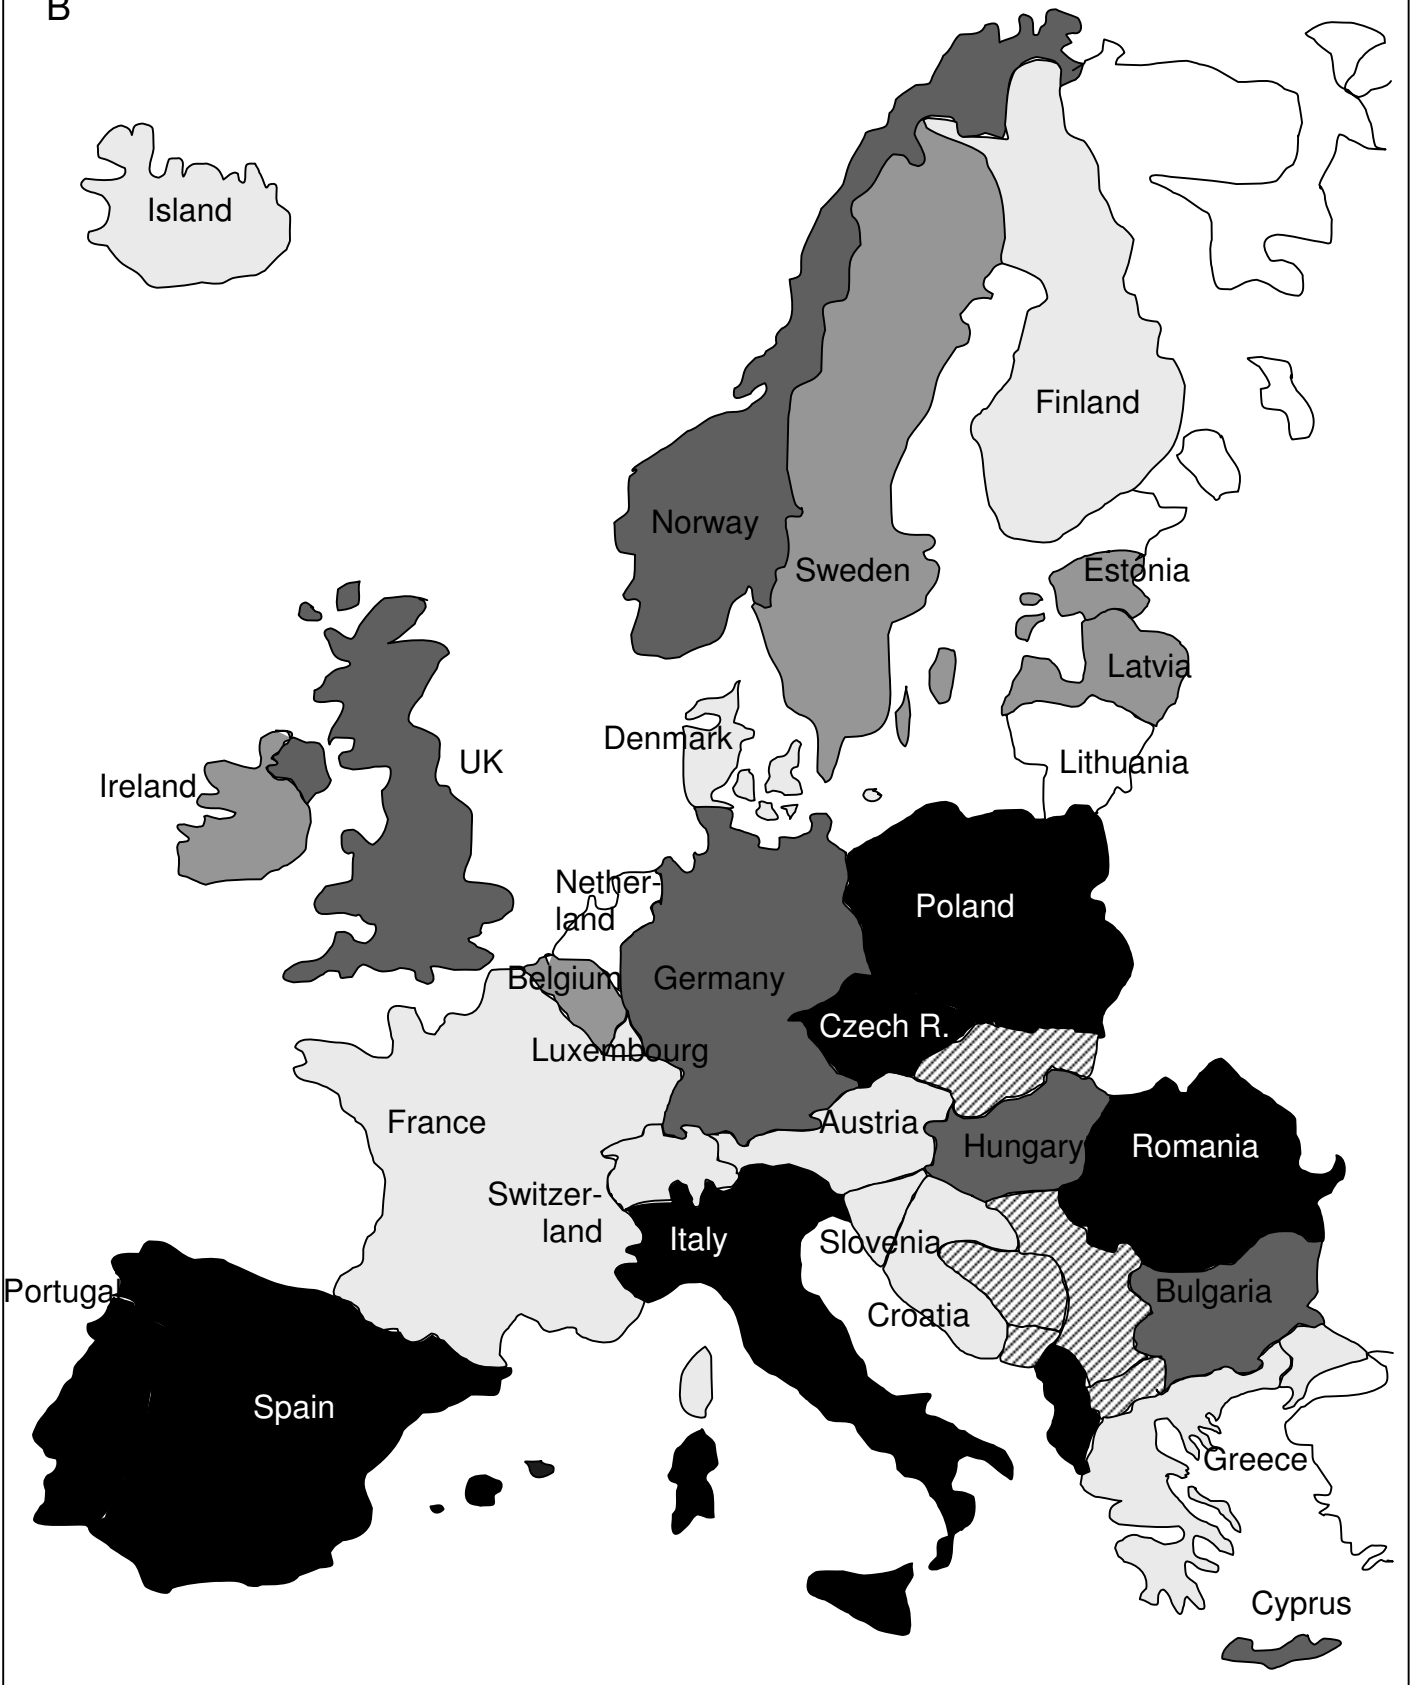

% obese (BMI  $\geq$  30)

$\leq$  10

10.1-15

15.1-20

20.1-25

> 25

no data

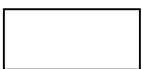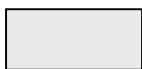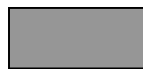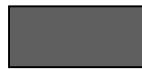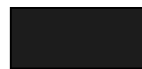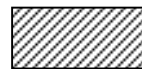

Supplement: MOESM2 [file 9502608]
